# Supplementary material
Source: Research Square preprint supplement (doi:10.21203/rs.3.rs-9284874/v1)
Supplement: Supplementary file 1 [file bd4e7fcc8f5b14a1f560132e.docx]

**Supplementary materials:** Manual correction protocol for patient orientation errors in TPS (Figure S1)**.**

Patient orientation errors during CT simulation critically affect radiation treatment accuracy, demanding complex, time-consuming manual corrections that risk new errors. Spatial reasoning challenges with advanced image orientation tools highlight this difficulty, making automated real-time verification at CT scan entry crucial. Accurate patient position correction requires careful verification: anatomical indicators (green for left hand, red for nose) and directional labels (A/P/L/R) must precisely match CT image anatomy and patient geometry. Each manual correction, taking 15-30 minutes, risks further errors due to its complexity, underscoring the value of automated solutions like the JASE system. Eclipse's "Advanced" rotation options use Euler angles: Alpha (X-axis/roll), Beta (Y-axis/pitch), and Gamma (Z-axis/yaw). These are vital for reorienting misaligned images; for example, a 180-degree Gamma rotation corrects images flipped along the patient's long axis.

**Fig. S1**. This figure illustrates steps to manually correct patient orientation errors in Eclipse, specifically for a head-first-supine (HFS) scan mislabeled as head-first-prone (HFP). The workflow includes: (A) The "Change Image Orientation" dialog; (B) Accessing correction tools; (C) Initial "Change Patient Position" dialog (HFS to HFP); (D) "Rotation" dialog with Gamma set to 180 degrees; (E) An incorrectly rotated image after initial position change; and (F) The final correctly aligned image. This multi-step process highlights manual correction complexities.
